# Supplementary material
Source: Elsevier journal article supplement (https://www.sciencedirect.com/science/article/pii/S1885585725003214)
Supplement: mmc1 [file mmc1.doc]

Table S1. Main publications reporting the prevalence of abdominopelvic veinous abnormalities based on MRI, CT scan or aortography imaging, in patients without a history of PFO-related arterial events

| First author, year of publication | Reported prevalence | Studied population |
| --- | --- | --- |
| *May-Thurner-Cockett phenomenon* | | |
| Costa, 20211 | 1/33 (4.8%) patients presented with ≥50% compression of the left common iliac vein area in supine decubitus based on MRI evaluation | Asymptomatic patients undergoing pelvic MRI for nonvascular-related disorders and not reporting any lower-limb symptoms |
| Aurshina, 20212 | 9/120 (7.5%) patients who presented with severe compression of the left iliac vein based on MRI evaluation | Patients undergoing abdominopelvic MRI evaluation for any indications excluding the presence of metastatic cancer. Of note, these patients were not asymptomatic as 23% reported varicose veins, 33% reported venous symptoms and 19% had a history of deep vein thrombosis |
| Zhu, 20223 | -85/896 (9.5%) of the asymptomatic patients based on CT scan evaluation  -70/93 (75.3%) of the symptomatic patients based on CT scan evaluation | -Asymptomatic patients: all-comers without CT evidence of acute or prior left iliofemoral deep vein thrombosis  -Symptomatic patients: patients with left iliofemoral deep vein thrombosis undergoing angioplasty |
| Li, 20244 | 89/1698 (5.2%) based on CT scan evaluation | Asymptomatic patients without history of venous thromboembolism, or documented symptoms suggestive of venous insufficiency |
| *Nutcracker syndrome* | | |
| Poyraz, 20135 | 41/1000 (4.1%) patients presented with a ≥ 50% of the left renal vein between the superior mesenteric artery and the aorta based on CT scan evaluation | All-comers undergoing abdominopelvic CT evaluation for any indications excluding patients with malformations or renal vasculature and disease |
| Grimm, 20156 | 4/99 (4.0%) based on CT evaluation | Potential renal transplant donors |
| Shi, 20187 | 22/6225 (0.35%) patients presented with posterior Nutcracker syndrome based on CT evaluation | All-comers undergoing abdominopelvic evaluation for any indications |
| Szaflarski, 20188 | 18/1042 (1.7%) based on CT evaluation | Female all-comers aged between 25 and 65 y |
| Ribeiro, 20209 | 23/295 (7.8%) based on CT evaluation | Living kidney donors |
| Goes, 202010 | 1/95 (1.1%) based on CT evaluation | Adult patients undergoing abdominopelvic scan without findings suggestive of malignancy or the presence of a vascular stent |
| Atli, 202511 | 3/131(2.3%) based on CT evaluation | Living kidney donors |
| *Pelvic varices* | | |
| Belenky, 200212 | 27/273 (9.9%) patients who showed ovarian varices at abdominal aortography | Living female kidney donors |
| Nascimento, 200213 | 8/21 (38%) patients with passive reflux of the left renal vein into the left gonadal vein | Living female kidney donors |
| Koc, 200714 | 59/324 (18%) showing pelvic varices on pelvic scan | Female patients without symptoms of pelvic congestion syndrome |
| Dick, 201015 | 11/13 (84%) based on MRI venous evaluation | Female patients with known pelvic congestion syndrome |
| Szaflarski, 20188 | 143/1042 (13.7%) showing ovarian vein dilatation on pelvic scan | Female all-comers aged between 25 and 65 y |
| Ribeiro, 20209 | 4/295 (1.4%) based on CT evaluation | Living kidney donors |
| Awad, 202016 | 30/200 (15%) based on CT evaluation | Female patients with chronic pelvic pain (suspected of having pelvic congestion syndrome) |
| Attia, 202217 | 10/25 (40%) based on venous MRI evaluation | Female patients with known pelvic congestion syndrome |

CT, computed tomography; MRI, magnetic resonance imaging; PFO, patent foramen ovale.

REFERENCES

1. Costa LMG, Tachibana A, Magao F da S, Wolosker N, Baroni RH. Magnetic Resonance Imaging Evaluation of Left Common Iliac Vein Compression in Patients With and Without Symptoms of Venous Disease. *Circ J Off J Jpn Circ Soc*. 2020;84(5):763-768. doi:10.1253/circj.CJ-19-0913

2. Aurshina A, Huber S, Deng Y, et al. Correlation of venous symptoms with iliac vein stenosis on magnetic resonance imaging. *J Vasc Surg Venous Lymphat Disord*. 2021;9(5):1291-1296.e1. doi:10.1016/j.jvsv.2020.12.077

3. Zhu Q, Yang L, Zhu H, et al. Prevalence of left iliac vein compression in an asymptomatic population and patients with left iliofemoral deep vein thrombosis: A multicenter cross-sectional study in southern China. *Phlebology*. 2022;37(8):602-609. doi:10.1177/02683555221113111

4. Li HL, Kwan KJS, Chan YC, Wulamu W, Cheng SW. Prevalence and predictors of radiological left common iliac vein compression in asymptomatic patients. *J Vasc Surg Venous Lymphat Disord*. 2024;12(1):101661. doi:10.1016/j.jvsv.2023.07.011

5. Poyraz AK, Firdolas F, Onur MR, Kocakoc E. Evaluation of left renal vein entrapment using multidetector computed tomography. *Acta Radiol Stockh Swed 1987*. 2013;54(2):144-148. doi:10.1258/ar.2012.120355

6. Grimm LJ, Engstrom BI, Nelson RC, Kim CY. Incidental detection of nutcracker phenomenon on multidetector CT in an asymptomatic population: prevalence and associated findings. *J Comput Assist Tomogr*. 2013;37(3):415-418. doi:10.1097/RCT.0b013e3182873235

7. Shi Y, Yang H, Feng Z, Chen F, Zhang H, Wu Z. Evaluation of posterior nutcracker phenomenon using multisection spiral CT. *Clin Radiol*. 2018;73(12):1060.e9-1060.e16. doi:10.1016/j.crad.2018.07.110

8. Szaflarski D, Sosner E, French TD, et al. Evaluating the frequency and severity of ovarian venous congestion on adult computed tomography. *Abdom Radiol N Y*. 2019;44(1):259-263. doi:10.1007/s00261-018-1707-9

9. Ribeiro FS, Puech-Leão P, Zerati AE, Nahas WC, David-Neto E, De Luccia N. Prevalence of left renal vein compression (nutcracker phenomenon) signs on computed tomography angiography of healthy individuals. *J Vasc Surg Venous Lymphat Disord*. 2020;8(6):1058-1065. doi:10.1016/j.jvsv.2020.04.005

10. Góes AM de O, Araújo R de S, Furlaneto IP, Vieira W de B. Compression of left renal vein and left common iliac vein on CT scans: how often are they detected? *J Vasc Bras*. 2020;19:e20190121. doi:10.1590/1677-5449.190121

11. Atli E, Ferhatoglu MF, Gurkan A. Prevalence of left kidney vein entrapment signs on computed tomography angiography images of kidney donors. *Folia Morphol*. 2025;84(3):580-586. doi:10.5603/fm.102679

12. Belenky A, Bartal G, Atar E, Cohen M, Bachar GN. Ovarian varices in healthy female kidney donors: incidence, morbidity, and clinical outcome. *AJR Am J Roentgenol*. 2002;179(3):625-627. doi:10.2214/ajr.179.3.1790625

13. Nascimento AB, Mitchell DG, Holland G. Ovarian veins: magnetic resonance imaging findings in an asymptomatic population. *J Magn Reson Imaging JMRI*. 2002;15(5):551-556. doi:10.1002/jmri.10098

14. Koc Z, Ulusan S, Oguzkurt L. Association of left renal vein variations and pelvic varices in abdominal MDCT. *Eur Radiol*. 2007;17(5):1267-1274. doi:10.1007/s00330-006-0440-x

15. Dick EA, Burnett C, Anstee A, Hamady M, Black D, Gedroyc WMW. Time-resolved imaging of contrast kinetics three-dimensional (3D) magnetic resonance venography in patients with pelvic congestion syndrome. *Br J Radiol*. 2010;83(994):882-887. doi:10.1259/bjr/82417499

16. Awad AS, Taha MMM, Manaf MHA, Gad MMM, Mashhour SN. Role of multi-detector CT venography in evaluation of pelvic congestion syndrome. *Egypt J Radiol Nucl Med*. 2020;51(1):159. doi:10.1186/s43055-020-00280-5

17. Attia NM, Sayed MA, Galal Mohamed HE, AbdelAleem MA. The role of MR venography with time-resolved imaging in diagnosis of pelvic congestion syndrome. *Egypt J Radiol Nucl Med*. 2022;53(1):19. doi:10.1186/s43055-021-00687-8
